# Supplementary material for: Paper-Based Colorimetric Detection of miRNA-21 Using Pre-Activated Nylon Membrane and Peroxidase-Mimetic Activity of Cysteamine-Capped Gold Nanoparticles
Source: MDPI journal article supplement (doi:10.3390/bios13010074), 2023-01-01
Supplement: s1 [file s1]

## Supplementary material

# Paper-Based Colorimetric Detection of MiRNA-21 Using Pre-activated Nylon Membrane and Peroxidase-Mimetic Activity of Cysteamine-Capped Gold Nanoparticles

Maliana El Aamri<sup>1</sup>, Hasna Mohammadi<sup>1</sup>, Aziz Amine<sup>1\*</sup>

<sup>1</sup> Chemical Analysis and Biosensors Group, Laboratory of Process Engineering and Environment, Faculty of Sciences and Techniques, Hassan II University of Casablanca, B.P 146, Mohammedia, Morocco

\*Corresponding authors: a.amine@univh2m.ac.ma (A. Amine)

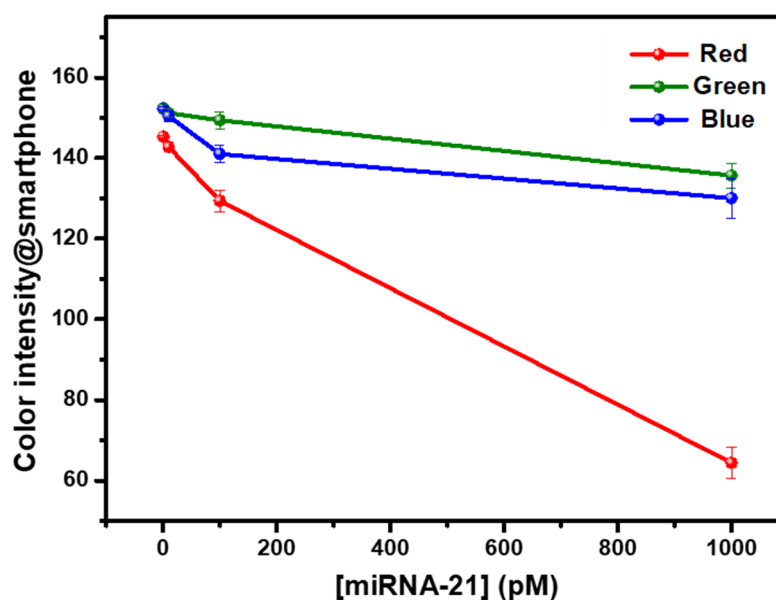

**Figure S1.** Relationship between the intensity of red, green, and blue color values and the concentration of microRNA (1, 10, 100, and 1000 pM) in the proposed approach while exposed to flash-lights-on in a dark box. Error bars were obtained from three parallel experiments.
